# Supplementary material for: Predictors of loss of ambulation in Friedreich's ataxia
Source: PubMed Central journal article supplement — eClinicalMedicine. 2020 Jan 8;18:100213. doi: 10.1016/j.eclinm.2019.11.006 (PMC6953645; doi:10.1016/j.eclinm.2019.11.006), 2020-01-08
Supplement: mmc2.pdf [file mmc2.pdf]

## Supplementary

**Supplementary Figure 1 (A) FARS Disability Staging (FDS) and (B) Item and Sub score Overview of the neurological part of the FARS exam (FARSn). The mFARS is an abbreviated, used in contemporary clinical studies.<sup>3</sup> Stance items within the FARS E/Upright stability sub score were marked in blue.**

### A

#### FARS Disability Staging (FDS)

|   |                      |                                                                                                                                                                                                                                                                                                                     |
|---|----------------------|---------------------------------------------------------------------------------------------------------------------------------------------------------------------------------------------------------------------------------------------------------------------------------------------------------------------|
| 0 | Normal.              |                                                                                                                                                                                                                                                                                                                     |
| 1 | No disability.       | Minimal signs detected by physician during screening. Can run or jump without loss of balance.                                                                                                                                                                                                                      |
| 2 | Minimal disability.  | Symptoms present, recognized by subject, but still mild. Cannot run or jump without losing balance. The subject is physically capable of leading an independent life, but daily activities may be somewhat restricted.                                                                                              |
| 3 | Mild disability.     | Symptoms are overt and significant. Requires regular or periodic holding onto wall/furniture or use of a cane for stability and walking.<br><small>(Note: Subjects postpone obtaining a cane by avoiding open spaces and walking with the aid of walls/people etc. These subjects are graded as stage 3.0.)</small> |
| 4 | Moderate disability. | Walking requires a walker, Canadian crutches or two canes. Or other aids such as walking dogs. Can perform several activities of daily living.                                                                                                                                                                      |
| 5 | Severe disability.   | Confined but can navigate a wheelchair. Can perform some activities of daily living that do not require standing or walking.                                                                                                                                                                                        |
| 6 | Total disability.    | Confined to wheelchair or bed with total dependency for all activities of daily living.                                                                                                                                                                                                                             |

### B

|                                                                                                                                                                                                                            | FARSn<br>(125)    | mFARS<br>(93)     |
|----------------------------------------------------------------------------------------------------------------------------------------------------------------------------------------------------------------------------|-------------------|-------------------|
| A1 (3) facial atrophy    A3 (2) cough<br>A2 (3) tongue atrophy    A4 (3) speech                                                                                                                                            | Bulbar            | Bulbar            |
| B1 (3+3) finger-finger    B4 (3+3) rapid movements<br>B2 (4+4) nose-finger    B5 (4+4) finger taps<br>B3 (4+4) dysmetria                                                                                                   | Upper Limb        | Upper Limb        |
| C1 (4+4) heel shin slide<br>C2 (4+4) heel shin tap                                                                                                                                                                         | Lower Limb        | Lower Limb        |
| D1 (2+2) muscle atrophy    D4 (2+2) position sense<br>D2 (5+5) mus. weakness    D5 (2+2) deep tendon reflexes<br>D3 (2+2) vibratory sense                                                                                  | Peripheral Nerves |                   |
| E1 (4) sitting position    E4 (4) tandem stance<br>E2A (4) stance feet apart    E5 (4) stance dom. foot<br>E2B (4) - eyes closed    E6 (3) tandem walk<br>E3A (4) stance feet tog.    E7 (5) gait<br>E3B (4) - eyes closed | Upright Stability | Upright Stability |

**Supplementary Figure 2** Estimates for LoA and loss of function of FARS E stance items, onset group 15-24y (A) and >24y (B).

**A**

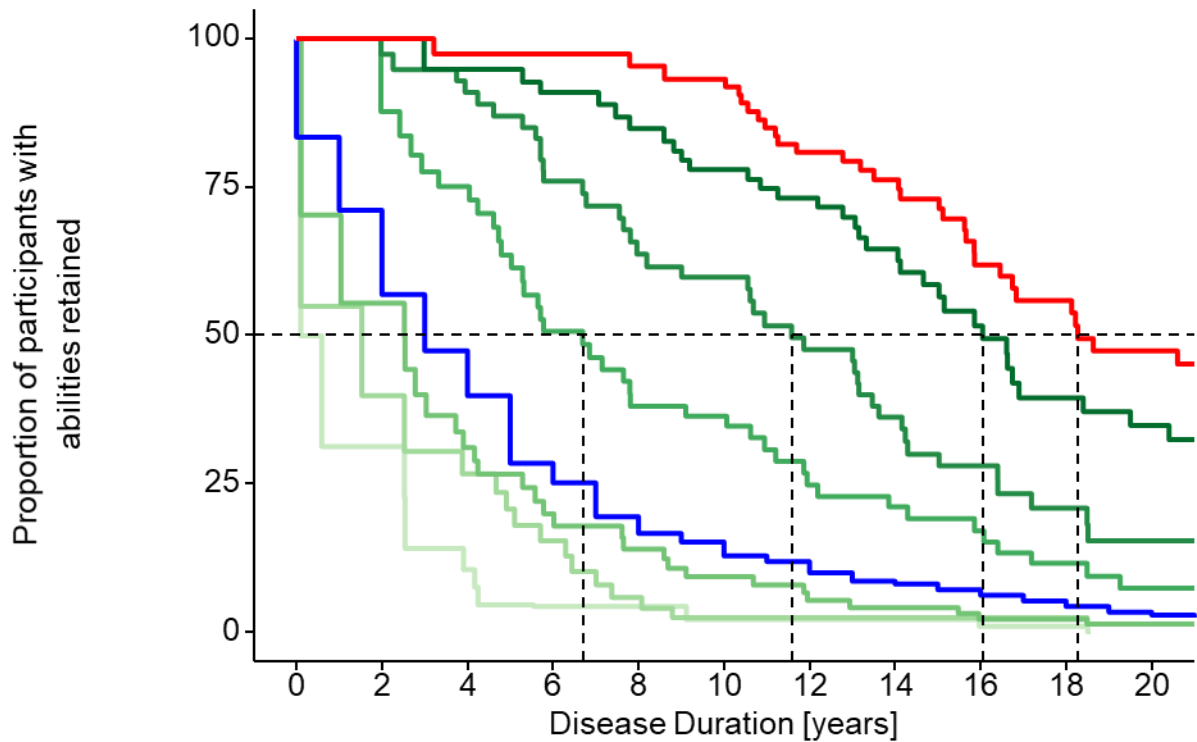

|                    |           | Number at risk |     |     |     |     |     |     |    |    |    |    |
|--------------------|-----------|----------------|-----|-----|-----|-----|-----|-----|----|----|----|----|
|                    |           | 0              | 2   | 4   | 6   | 8   | 10  | 12  | 14 | 16 | 18 | 20 |
| LoA / Stance Items | E5        | 211            | 65  | 22  | 7   | 7   | 3   | 3   | 3  | 2  | 2  | 0  |
|                    | E4        | 211            | 83  | 54  | 30  | 11  | 5   | 4   | 4  | 4  | 4  | 2  |
|                    | E3B       | 211            | 117 | 65  | 40  | 26  | 17  | 9   | 7  | 4  | 4  | 2  |
|                    | Diagnosis | 211            | 150 | 100 | 60  | 41  | 32  | 25  | 18 | 15 | 11 | 7  |
|                    | E2B       | 211            | 183 | 154 | 100 | 69  | 61  | 36  | 29 | 21 | 14 | 7  |
|                    | E3A       | 211            | 204 | 183 | 146 | 114 | 97  | 70  | 48 | 32 | 22 | 14 |
|                    | E2A       | 211            | 209 | 191 | 176 | 151 | 127 | 108 | 84 | 60 | 41 | 33 |
|                    | LoA/E7    | 211            | 209 | 196 | 188 | 168 | 150 | 117 | 99 | 72 | 59 | 44 |

# B

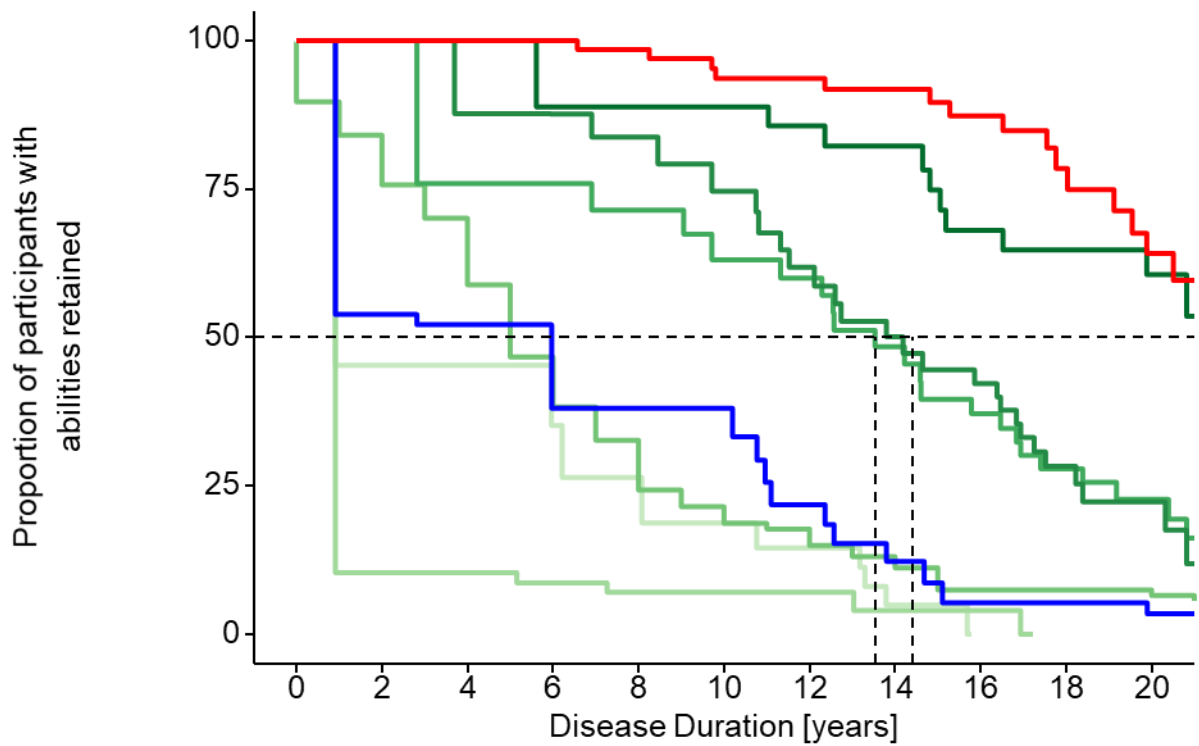

|                    |           | Number at risk |     |     |    |    |    |    |    |    |    |    |
|--------------------|-----------|----------------|-----|-----|----|----|----|----|----|----|----|----|
| LoA / Stance Items |           | 0              | 2   | 4   | 6  | 8  | 10 | 12 | 14 | 16 | 18 | 20 |
|                    |           | E5             | 107 | 49  | 49 | 35 | 26 | 17 | 12 | 3  | 0  | 0  |
|                    | E4        | 107            | 11  | 11  | 8  | 6  | 6  | 6  | 2  | 2  | 0  | 0  |
|                    | E3B       | 107            | 90  | 75  | 50 | 35 | 23 | 19 | 14 | 8  | 8  | 8  |
|                    | Diagnosis | 107            | 58  | 54  | 38 | 36 | 34 | 18 | 9  | 4  | 4  | 3  |
|                    | E2B       | 107            | 107 | 80  | 77 | 69 | 56 | 51 | 40 | 29 | 20 | 13 |
|                    | E3A       | 107            | 107 | 92  | 87 | 80 | 66 | 53 | 42 | 34 | 18 | 11 |
|                    | E2A       | 107            | 107 | 105 | 88 | 85 | 78 | 72 | 63 | 48 | 35 | 27 |
|                    | LoA/E7    | 107            | 107 | 105 | 98 | 94 | 82 | 79 | 71 | 61 | 45 | 31 |

**Supplementary Table 1:** Number of Participants at Baseline visit with respective function loss patterns. A ‘0’ stands for able, a ‘1’ stands for unable. The expected pattern loss is E2B, E3A, E2A and E7. Percentages are based on onset groups.

| N (%)                                    | Onset Group | <15y     | 15-24y   | >24y     | All      |
|------------------------------------------|-------------|----------|----------|----------|----------|
| Pattern                                  |             |          |          |          |          |
| Expected pattern of function loss        |             |          |          |          |          |
| All regular                              |             | 676 (96) | 204 (97) | 101 (94) | 981 (96) |
| 000.0                                    |             | 202 (29) | 76 (36)  | 49 (45)  | 327 (32) |
| 100.0                                    |             | 96 (14)  | 35 (17)  | 10 (10)  | 141 (14) |
| 110.0                                    |             | 101 (14) | 22 (10)  | 11 (10)  | 134 (13) |
| 111.0                                    |             | 51 (7)   | 21 (10)  | 14 (13)  | 86 (8)   |
| 111.1                                    |             | 226 (32) | 50 (24)  | 17 (16)  | 293 (29) |
| Unusual patterns of function loss        |             |          |          |          |          |
| 010.0                                    |             | 22 (3)   | 4 (2)    | 5 (5)    | 31 (3)   |
| 101.0                                    |             | 0        | 1 (0)    | 0        | 1 (0)    |
| Non-ambulant, with some ability to stand |             |          |          |          |          |
| 110.1                                    |             | 4 (1)    | 2 (1)    | 1 (1)    | 7 (1)    |
| 010.1                                    |             | 1 (0)    | 0        | 0        | 1 (0)    |
| 011.1                                    |             | 0        | 0        | 0        | 0        |

**Supplementary Table 2:** Estimates for LoA by Onset group, and for loss of function of FARS E Items (Onset Groups 15-24y, >24y).

| Onset Subgroup                                                                      | Item | Description                       | Median Duration [y] | 25, 75 percentiles | Subjects | Observed Events | left censored [%] | truncation bias* [y] |
|-------------------------------------------------------------------------------------|------|-----------------------------------|---------------------|--------------------|----------|-----------------|-------------------|----------------------|
| Loss of Stance Functions in the FARS E Sub score, Intermediate Onset Group (15-24y) |      |                                   |                     |                    |          |                 |                   |                      |
| 15-24y                                                                              | E5   | Stance Dominant Foot              | 0.1                 | 0.1, 2.5           | 211      | 9               | 95                | 6.6                  |
| 15-24y                                                                              | E3B  | Stance Feet Together, Eyes Closed | 1.5                 | 0.1, 4.7           | 211      | 15              | 90                | 5.5                  |
| 15-24y                                                                              | E4   | Stance, Tandem                    | 2.5                 | 0.1, 5.3           | 211      | 27              | 84                | 6.1                  |
| 15-24y                                                                              | -    | Diagnosis of FRDA                 | 3.0                 | 1.0, 7.0           | 211      | 206             | 3                 | -                    |
| 15-24y                                                                              | E2B  | Stance Feet Apart, Eyes Closed    | 6.7                 | 4.0, 11.9          | 211      | 40              | 62                | 7.2                  |
| 15-24y                                                                              | E3A  | Stance, Feet Together             | 11.6                | 6.7, 16.4          | 211      | 43              | 47                | 3.4                  |
| 15-24y                                                                              | E2A  | Stance, Feet Apart                | 16                  | 10.8, 23.6         | 211      | 41              | 34                | 7.6                  |
| 15-24y                                                                              | E7   | LoA / Gait                        | 18.3                | 14.1, 27.5         | 211      | 45              | 25                | 7                    |
| 15-24y                                                                              | FDS  | Disease Stage                     | 20.4                | 14.5, 28.2         | 211      | 41              | 25                | 4.5                  |
| Loss of Stance Functions in the FARS E Sub score, Late Onset Group (>24y)           |      |                                   |                     |                    |          |                 |                   |                      |
| >24y                                                                                | E5   | Stance Dominant Foot              | 0.9                 | 0.9, 0.9           | 107      | 3               | 95                | 16                   |
| >24y                                                                                | E4   | Stance, Tandem                    | 0.9                 | 0.9, 8.1           | 107      | 9               | 86                | 12.4                 |
| >24y                                                                                | -    | Diagnosis of FRDA                 | 5.0                 | 3.0, 8.0           | 107      | 104             | 4                 | -                    |
| >24y                                                                                | E3B  | Stance Feet Together, Eyes Closed | 6.0                 | 0.9, 11.1          | 107      | 14              | 79                | 7.8                  |
| >24y                                                                                | E2B  | Stance Feet Apart, Eyes Closed    | 13.5                | 6.9, 19.2          | 107      | 25              | 50                | 5.6                  |
| >24y                                                                                | E3A  | Stance, Feet Together             | 14.2                | 9.7, 18.4          | 107      | 26              | 45                | 3.3                  |
| >24y                                                                                | E2A  | Stance, Feet Apart                | 22.4                | 14.8, 30.1         | 107      | 14              | 29                | 7.7                  |
| >24y                                                                                | FDS  | Disease Stage                     | 23.5                | 16.9, 30.1         | 107      | 15              | 22                | 6.7                  |
| >24y                                                                                | E7   | LoA / Gait                        | 23.5                | 18, 30.1           | 107      | 21              | 17                | 4.7                  |
